# Supplementary material for: Loss of histone H4K20 trimethylation predicts poor prognosis in breast cancer and is associated with invasive activity
Source: PubMed Central journal article supplement (PMC4229880; doi:10.1186/bcr3681), 2014-06-22

Figure S1 Yokoyama et al.,  
H4K20me3 staining in benign tumor tissue

H4K20me3

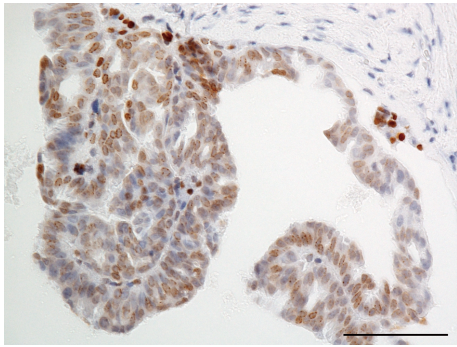

HE staining

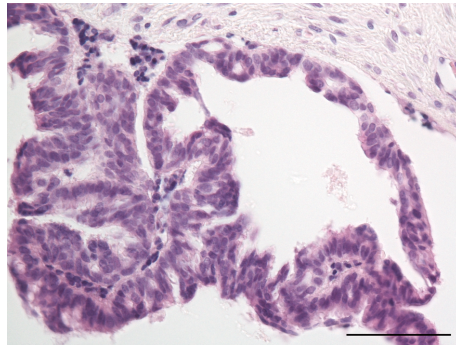

Supplement: bcr3681-S2.pdf [file bcr3681-S2.pdf]
