# Supplementary material for: Loss of histone H4K20 trimethylation predicts poor prognosis in breast cancer and is associated with invasive activity
Source: PubMed Central journal article supplement (PMC4229880; doi:10.1186/bcr3681), 2014-06-22

Yokoyama et al. Figure S2  
Kaplan-Meier analysis of ER expression in breast-cancer patients

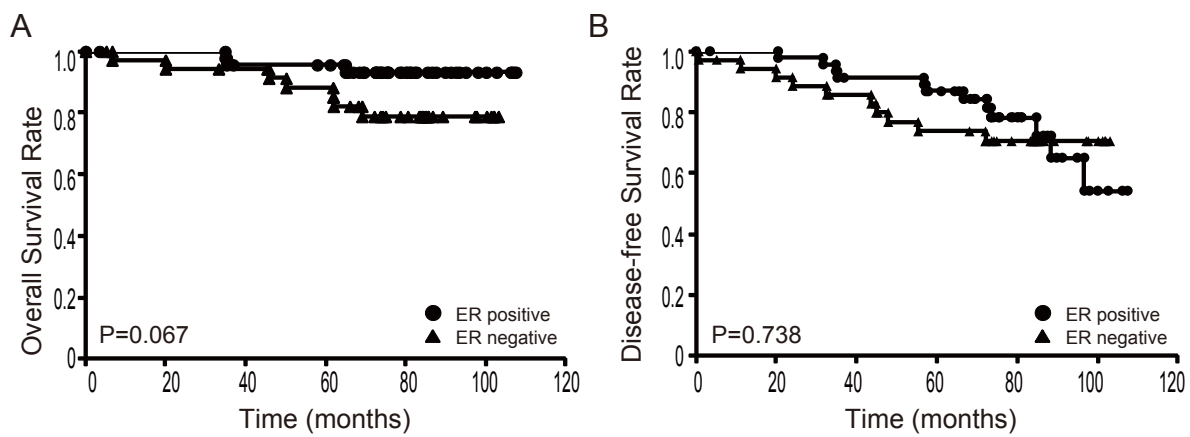

Supplement: bcr3681-S5.pdf [file bcr3681-S5.pdf]
